# Supplementary material
Source: PubMed Central journal article supplement (PMC8990187)
Supplement: bmjstel-2017-000270.supp1.pdf [file bmjstel-2017-000270.supp1.pdf]

## Appendix I

Age:

Occupation:

Ethnicity:

Personal laparoscopic surgery experience (you do not have to disclose):

Have you heard of laparoscopic (keyhole) surgery?

Yes

No

Unsure

Are you aware of any benefits of keyhole surgery (KS)? Please list

Are you aware of any disadvantages of keyhole surgery? Please list

If you required surgery and were given the choice would you prefer

KS

Open surgery

Are you aware of how doctors are trained to undertake KS?

Yes it is on patients

Yes it is on simulators

No am not aware

Not sure

Do you believe junior doctors are getting sufficient training in KS?

Yes sufficient

Adequate

No not sufficient

Not sure

Have you ever heard of surgical simulation training for KS?

Yes

No

Unsure

*At this point – describe current evidence and the known benefits and disadvantages of simulation training*

What are your views on simulation training doctors in KS compared to training on patients in live operations?

Simulation favoured  
Equally favoured  
Simulation not favoured  
Unsure

What is your view on the future availability of simulation training in KS?

Essential  
Desirable  
Undesirable  
Unsure

Do you feel simulation training in KS for junior doctors should be

Mandatory  
Recommended  
Offered  
Unsure

What is your view about junior doctors obtaining a level of competency in KS on simulators before operating on real patients?

Must pass a test on simulation equipment first  
Preferably pass a test on simulation equipment first  
Test not needed  
Not sure

**Free text for further comments**

## Appendix II

Age:

Gender:

Obs/Gyn/Oncology/Both

Clinical experience - how many years as Cons?

Teaching experience – education qualification

Managerial experience – have you been a medical manager?

Laparoscopic surgery experience-

a) Professional

b) Personal

### Research questions

#### **What are hospital managers' knowledge, views and opinions on:**

- Laparoscopic surgery
- Current laparoscopic surgical training for junior trainees
- Effect of laparoscopic surgery training on units
- Simulation training in units
- Use of simulation in laparoscopic surgical training
- Implementation of laparoscopic surgical simulation training

### Introduction

I am undertaking individual, semi-structured interviews with all hospital managers (general surgical/gynaecology) and college tutors across units in the SW SHA. I am aiming to explore views on current laparoscopic surgical training and the use of simulation in surgical training. The study is part of my MD investigating the implementation of laparoscopic VR simulation training in gynaecology.

The interview will be completely anonymous and will be digitally tape-recorded. It will last on average 30 - 60 minutes.

### Questions

Are you aware of any proven benefits of laparoscopic surgery for patients?  
Please list

Are you aware of any benefits of laparoscopic surgery for your unit?  
Please list

Are you aware of any disadvantages of laparoscopic surgery for patients?  
Please list

Are you aware of any disadvantages of laparoscopic surgery for your unit?  
Please list

Do you know how your unit compares with other units in the region/nationally with respect to the use of laparoscopic surgery?

Do you think your unit should be doing

More LS

Same amount LS

Less LS

Unsure

Are you aware of any barriers to performing laparoscopic surgery in your unit?  
Please list

Are you aware of the how junior trainees in your unit are trained in laparoscopic surgery?

Do you feel current junior trainees in gynaecology in your unit are getting sufficient laparoscopic training to achieve required competencies?

Yes sufficient

Adequate

No not sufficient

Unsure

Are you aware of any issues with current training for junior trainees in laparoscopic surgery in your unit? Please list

Are you aware of any strategies in your unit for further development of training for laparoscopic surgery? Please list

Do you have any views on the effect of laparoscopic surgery compared with open surgery on theatre efficiency in your unit?

Increases theatre efficiency

No effect on theatre efficiency

Reduces theatre efficiency

Unsure

Do you have any views on the effect of training junior trainees (ST1/2's) in laparoscopic surgery compared with open surgery on theatre efficiency in your unit?

Increases efficiency

No effect on theatre efficiency

Reduces theatres efficiency

Unsure

Are you aware of any risk management or patient safety issues relating to the training for laparoscopic surgery in your unit?

Do you have any views on the effect of training junior trainees (ST1/2's) in laparoscopic surgery compared with open surgery on patients' safety in your unit?

- Increases patient safety
- No effect on patient safety
- Reduces patient safety
- Unsure

Are you aware of surgical simulation training?

Regarding simulation would you say you were

- Well informed
- Somewhat informed
- Not at all

Do the trainees in your unit have access to simulators?

- Yes
- No
- Unsure

If yes what type(s)?

Are you aware of any surgical simulation training programs in your unit?

Are you aware of any benefits of surgical simulation training for trainees, patients, the unit? Please list

Are you aware of any disadvantages of surgical simulation training for trainees, patients, the unit? Please list

Are you aware of any disadvantages of surgical simulation training for patients, unit? Please list

Does your unit have a formal strategy for further development of simulation training in your unit? Please list

Which do you believe is the preferred method of simulation training for junior trainees in laparoscopic surgery out of the following?

- Virtual reality (VR) simulation training
- Mechanical box training

Are you aware of any barriers or problems with the implementation of simulation training programmes in your unit? Please list

Trainers are engaged with laparoscopic simulation training for their trainees?

- Strongly agree
- Agree
- Disagree
- Strongly disagree
- Unsure

Trainees are engaged with laparoscopic simulation training?

Strongly agree

Agree

Disagree

Strongly disagree

Unsure

Does your unit undertake financial cost-benefit analysis prior to purchasing educational equipment?

Do you have any view on the priority that should be given to the purchase of simulators in your unit and/or in the NHS?

High priority

Mod priority

Low priority

Unsure

*At this point – describe current evidence and the known benefits and disadvantages of simulation training*

What is your view on the future availability of laparoscopic simulation training in your unit?

Essential

Desirable

Undesirable

Unsure

Do you feel laparoscopic simulators improve the quality of laparoscopic training?

Strongly agree

Agree

Disagree

Unsure

What is your view on the use of laparoscopic simulation equipment for trainees?

Mandatory

Recommended

Offered

Unsure

What is your view about level of competency in laparoscopic simulation before operating on real patients?

Must pass a test on simulation equipment first

Preferably pass a test on simulation equipment first

Test not needed

Not sure

**Free text for further comments**
